# Supplementary material for: Compositional Analysis of the Associations between 24-h Movement Behaviours and Health Indicators among Adults and Older Adults from the Canadian Health Measure Survey
Source: Int J Environ Res Public Health. 2018 Aug 18;15(8):1779. doi: 10.3390/ijerph15081779 (PMC6121426; doi:10.3390/ijerph15081779)

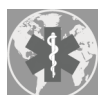

# Supplementary Materials: Compositional Analysis of the Associations between 24-Hour Movement Behaviours and Health Indicators among Adults and Older Adults from the Canadian Health Measure Survey

**Table S1.** Weighted participant characteristics of the 2007/09, 2009/11, 2012/13 CHMS

| Variables                                                                            | Adults (18–64)                    |                                             | Older Adults (65–80)              |                                            |
|--------------------------------------------------------------------------------------|-----------------------------------|---------------------------------------------|-----------------------------------|--------------------------------------------|
|                                                                                      | Full sample<br>( <i>n</i> = 6322) | Fasting<br>sub-sample<br>( <i>n</i> = 2833) | Full sample<br>( <i>n</i> = 1454) | Fasting<br>sub-sample<br>( <i>n</i> = 697) |
| Age (years)                                                                          | 41.3 (0.2)                        | 41.8 (0.8)                                  | 69.3 (0.3)                        | 68.6 (0.4)                                 |
| Sex (%)                                                                              |                                   |                                             |                                   |                                            |
| - Male                                                                               | 50.4                              | 50.0                                        | 47.6                              | 50.7                                       |
| - Female                                                                             | 49.6                              | 50.0                                        | 52.4                              | 49.3                                       |
| Education (%)                                                                        |                                   |                                             |                                   |                                            |
| - Less than secondary school graduation                                              | 3.6                               | 2.6 <sup>E</sup>                            | 19.0                              | 15.8                                       |
| - Secondary school graduation                                                        | 11.3                              | 11.8                                        | 16.4                              | 17.5                                       |
| - Some post-secondary                                                                | 4.2                               | 3.7                                         | 2.7 <sup>E</sup>                  | 3.2                                        |
| - Post-secondary graduation                                                          | 80.9                              | 81.9                                        | 61.9                              | 63.5                                       |
| Smoking Status (%)                                                                   |                                   |                                             |                                   |                                            |
| - Yes                                                                                | 21.3                              | 21.0                                        | 12.2                              | 12.7                                       |
| - No                                                                                 | 78.7                              | 79.0                                        | 87.8                              | 87.3                                       |
| Alcohol Consumption (# of drinks per day)                                            | 0 (0.03)                          | 0 (0.05)                                    | 0 (0.05)                          | 0 (0.05)                                   |
| Chronic Condition (%)                                                                |                                   |                                             |                                   |                                            |
| - Yes                                                                                | 59.1                              | 57.8                                        | 90.4                              | 91.4                                       |
| - No                                                                                 | 40.9                              | 42.2                                        | 9.6                               | 8.6                                        |
| Self-rated health (%)                                                                |                                   |                                             |                                   |                                            |
| - Poor                                                                               | 2.0 <sup>E</sup>                  | 1.5 <sup>E</sup>                            | 2.7 <sup>E</sup>                  | 1.9                                        |
| - Fair                                                                               | 7.0                               | 6.1                                         | 11.1                              | 8.9                                        |
| - Good                                                                               | 34.7                              | 34.7                                        | 38.7                              | 37.1                                       |
| - Very Good                                                                          | 40.5                              | 42.4                                        | 34.0                              | 39.9                                       |
| - Excellent                                                                          | 15.8                              | 15.3                                        | 13.5                              | 12.2                                       |
| <b>Health Indicators</b>                                                             |                                   |                                             |                                   |                                            |
| BMI (m/kg <sup>2</sup> )                                                             | 26.2 (0.2)                        | -                                           | 27.3 (0.2)                        | -                                          |
| Waist Circumference (cm; <i>n</i> =4117 and <i>n</i> =951)‡                          | 91.4 (0.7)                        | -                                           | 97.1 (0.7)                        | -                                          |
| Systolic Blood Pressure (mmHg)                                                       | 108.5 (0.4)                       | -                                           | 123.2 (0.8)                       | -                                          |
| Diastolic Blood Pressure (mmHg)                                                      | 70.4 (0.3)                        | -                                           | 70.8 (0.4)                        | -                                          |
| Resting heart rate (beats per minute)                                                | 66.8 (0.3)                        | -                                           | 64.6 (0.5)                        | -                                          |
| Grip Strength (Age: 18-79; kg; <i>n</i> =4437 and <i>n</i> =937)                     | 68.3 (1.3)                        | -                                           | 55.9 (1.3)                        | -                                          |
| Aerobic Fitness (Age: 18-79 years; Fitness score; <i>n</i> =3517 and <i>n</i> =200)† | 368.9 (2.9)                       | -                                           | 228.5 (4.8)                       | -                                          |
| Self-reported Mental Health (%)                                                      |                                   | -                                           |                                   | -                                          |
| - Poor/ Fair                                                                         | 5.4                               | -                                           | 3.0                               | -                                          |
| - Good                                                                               | 19.8                              | -                                           | 24.9                              | -                                          |
| - Very Good                                                                          | 39.8                              | -                                           | 37.3                              | -                                          |
| - Excellent                                                                          | 35.0                              | -                                           | 34.8                              | -                                          |
| HDL Cholesterol (mmol/L)                                                             | -                                 | 1.29 (0.02)                                 | -                                 | 1.37 (0.03)                                |
| LDL Cholesterol (mmol/L; <i>n</i> =2084 and <i>n</i> =485)                           | -                                 | 2.70 (0.05)                                 | -                                 | 2.67 (0.08)                                |
| ‡                                                                                    |                                   |                                             |                                   |                                            |

|                                      |   |              |   |              |
|--------------------------------------|---|--------------|---|--------------|
| C-reactive Protein (mg/L)            | - | 1.22 (0.07)  | - | 1.61 (0.12)  |
| Triglycerides (mmol/L)               | - | 1.11 (0.03)  | - | 1.25 (0.05)  |
| Insulin (pmol/L)                     | - | 54.78 (1.67) | - | 63.74 (2.45) |
| Glucose (mmol/L; n=3199 and n=726) ‡ | - | 4.81 (0.03)  | - | 5.19 (0.05)  |

HDL = High-density lipoprotein cholesterol; LDL = Low-density lipoprotein cholesterol; Data presented as median (standard error) for continuous variations and percentage for categorical variables; ‡ Waist circumference, LDL Cholesterol, and Glucose includes participants from cycle 2 and 3 only. † Aerobic Fitness included participants from cycle 1 and 2 only. <sup>E</sup> = interpret with caution (coefficient of variation 16.6% to 33.3%)

#### Color Key

|                                                                |
|----------------------------------------------------------------|
| Continuous variable<br>presented as median<br>(standard error) |
| Value of categorical variable<br>presented as percentage       |

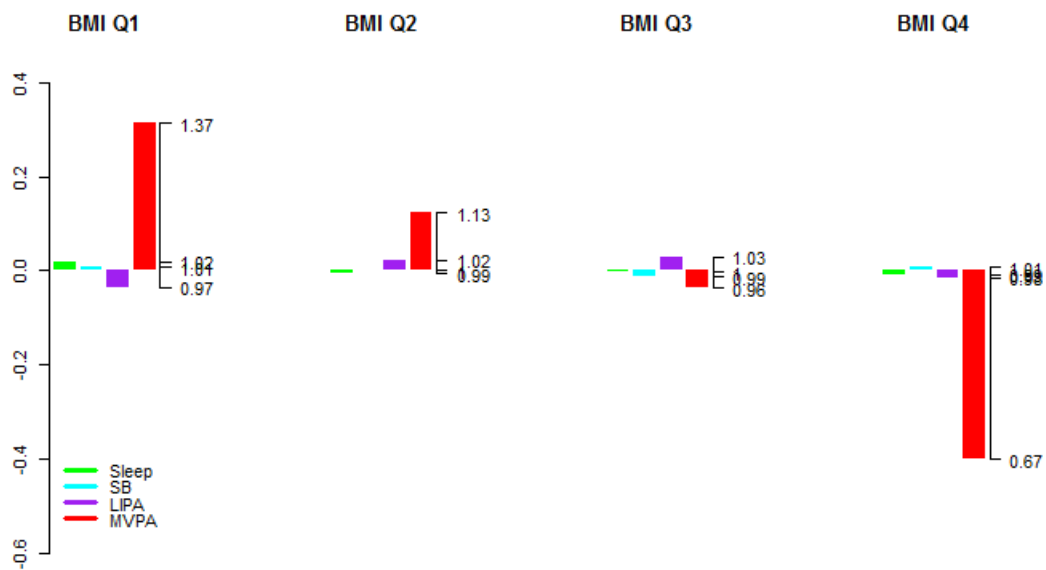

**Figure S1.** Average time-use compositions of the 24 hour day by BMI quartiles for adults aged (18–64) in log-ratio scale and relative to the overall average time-use composition at the zero baseline. The left axis gives the log-ratio value and the right axis gives the actual proportion relative to the mean composition (e.g. 1.20 means 1.20 times).

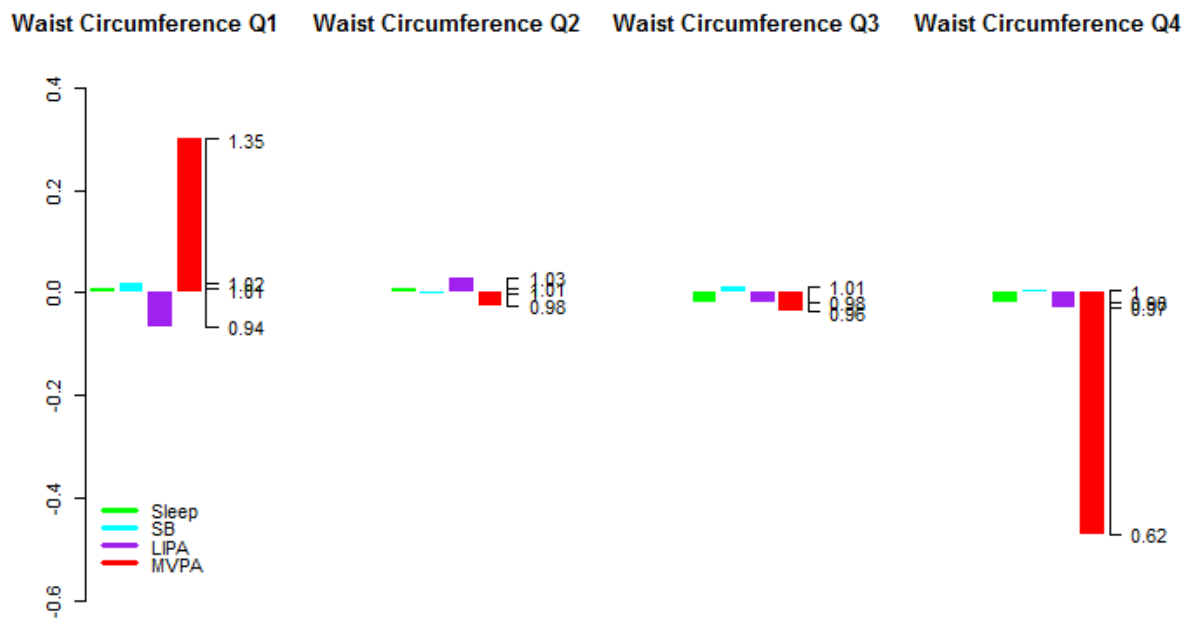

**Figure S2.** Average time-use compositions of the 24 hour day by waist circumference quartiles for adults aged (18–64) in log-ratio scale and relative to the overall average time-use composition at the zero baseline. The left axis gives the log-ratio value and the right axis gives the actual proportion relative to the mean composition (e.g. 1.20 means 1.20 times).

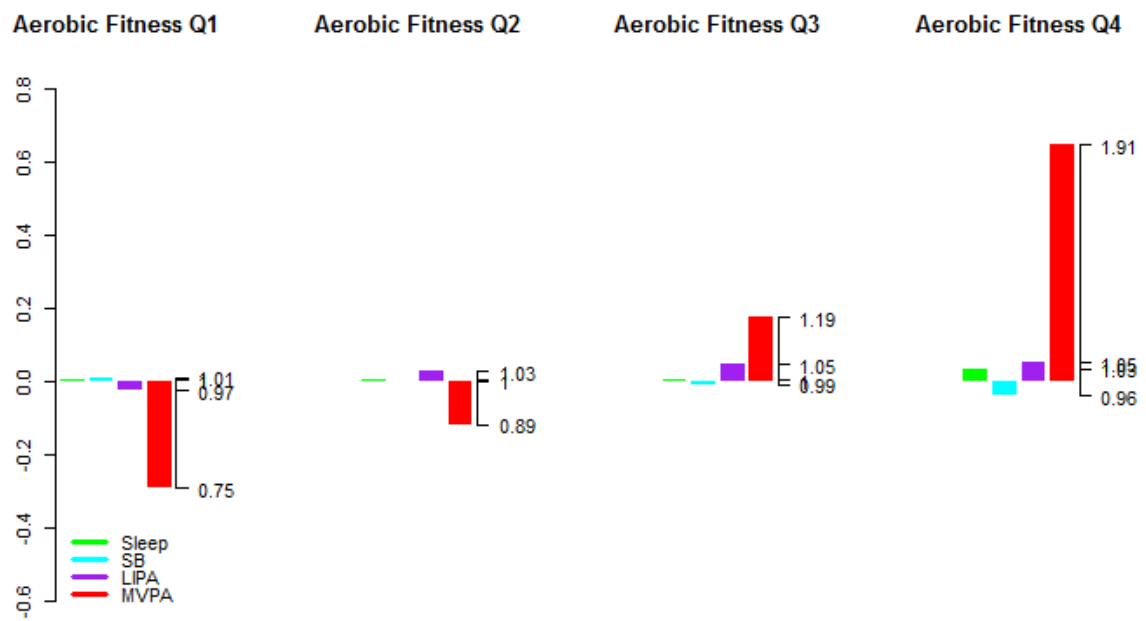

**Figure S3.** Average time-use compositions of the 24 hour day by VO2 maximum quartiles for adults aged (18–64) in log-ratio scale and relative to the overall average time-use composition at the zero baseline. The left axis gives the log-ratio value and the right axis gives the actual proportion relative to the mean composition (e.g. 1.20 means 1.20 times).

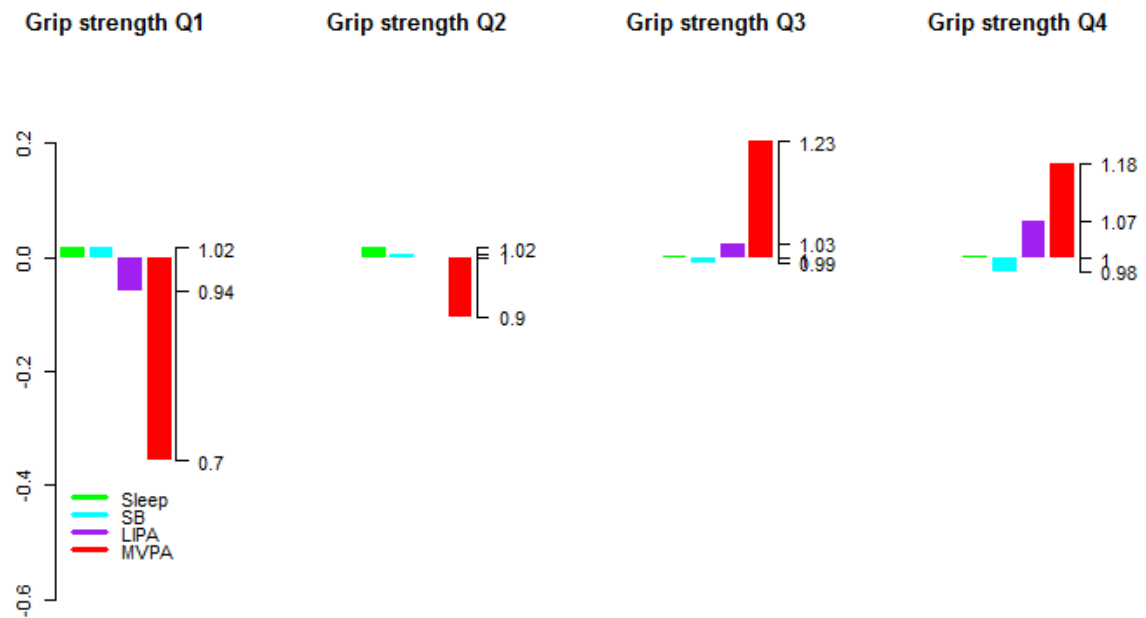

**Figure S4.** Average time-use compositions of the 24 hour day by grip strength quartiles for adults aged (18–64) in log-ratio scale and relative to the overall average time-use composition at the zero baseline. The left axis gives the log-ratio value and the right axis gives the actual proportion relative to the mean composition (e.g. 1.20 means 1.20 times).

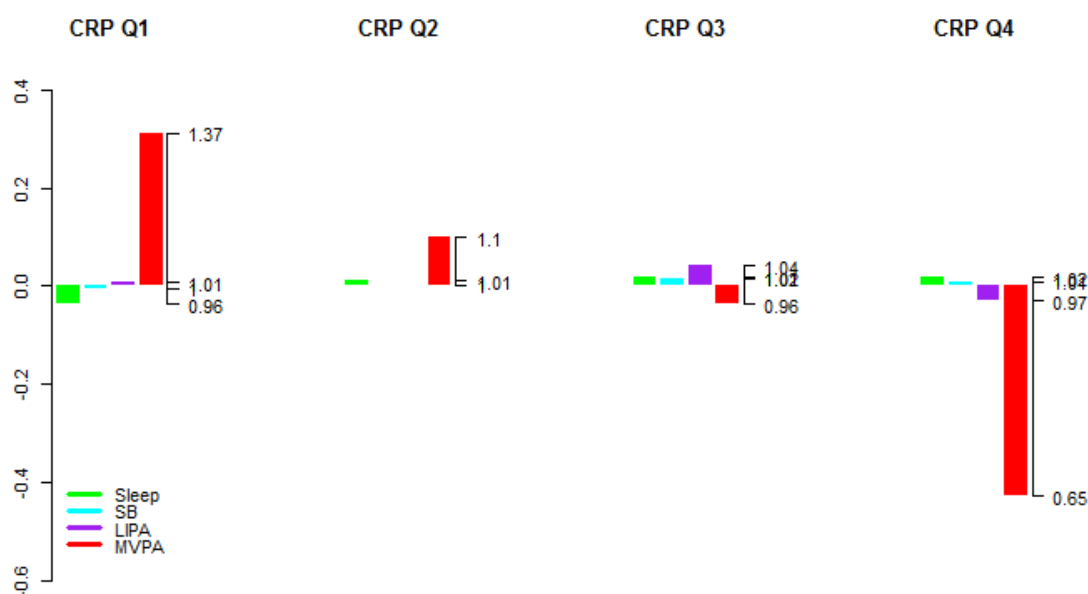

**Figure S5.** Average time-use compositions of the 24 hour day by CRP quartiles for adults aged (18–64) in log-ratio scale and relative to the overall average time-use composition at the zero baseline. The left axis gives the log-ratio value and the right axis gives the actual proportion relative to the mean composition (e.g. 1.20 means 1.20 times).

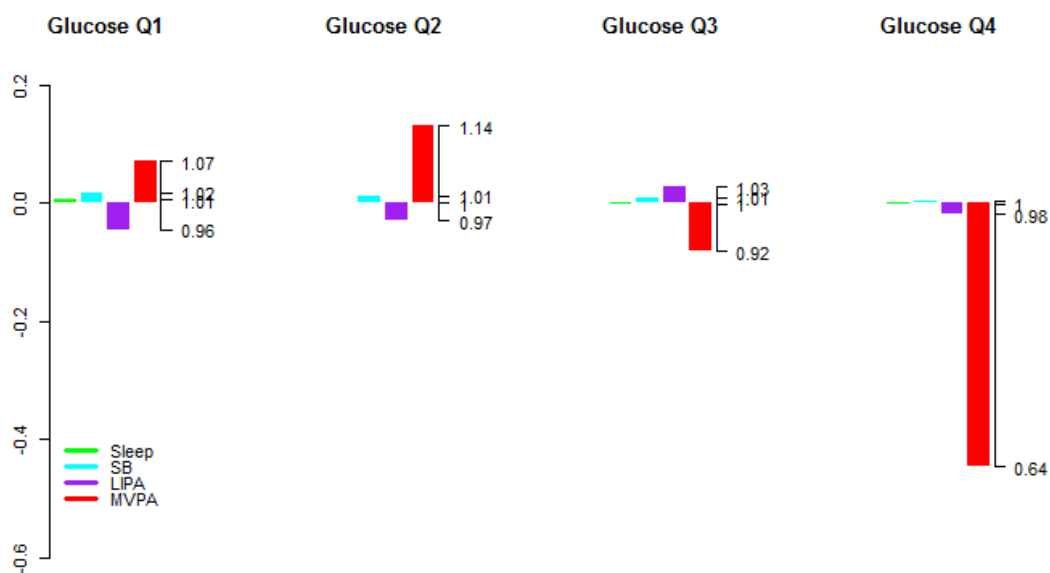

**Figure S6.** Average time-use compositions of the 24 hour day by blood glucose quartiles for adults aged (18–64) in log-ratio scale and relative to the overall average time-use composition at the zero baseline. The left axis gives the log-ratio value and the right axis gives the actual proportion relative to the mean composition (e.g. 1.20 means 1.20 times).

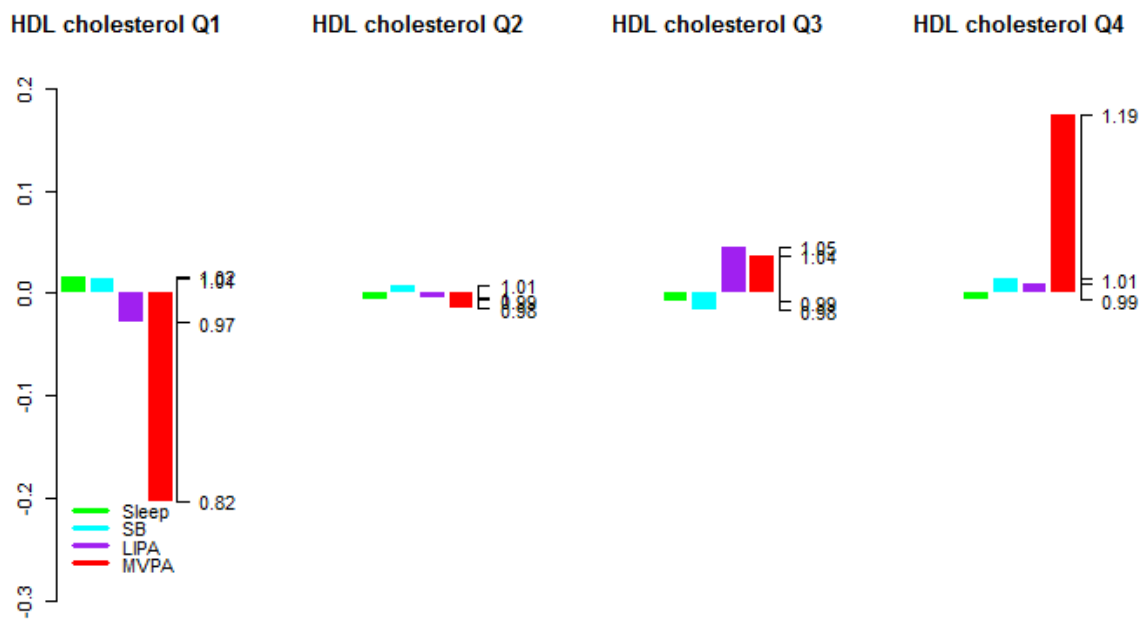

**Figure S7.** Average time-use compositions of the 24 hour day by HDL cholesterol quartiles for adults aged (18–64) in log-ratio scale and relative to the overall average time-use composition at the zero baseline. The left axis gives the log-ratio value and the right axis gives the actual proportion relative to the mean composition (e.g. 1.20 means 1.20 times).

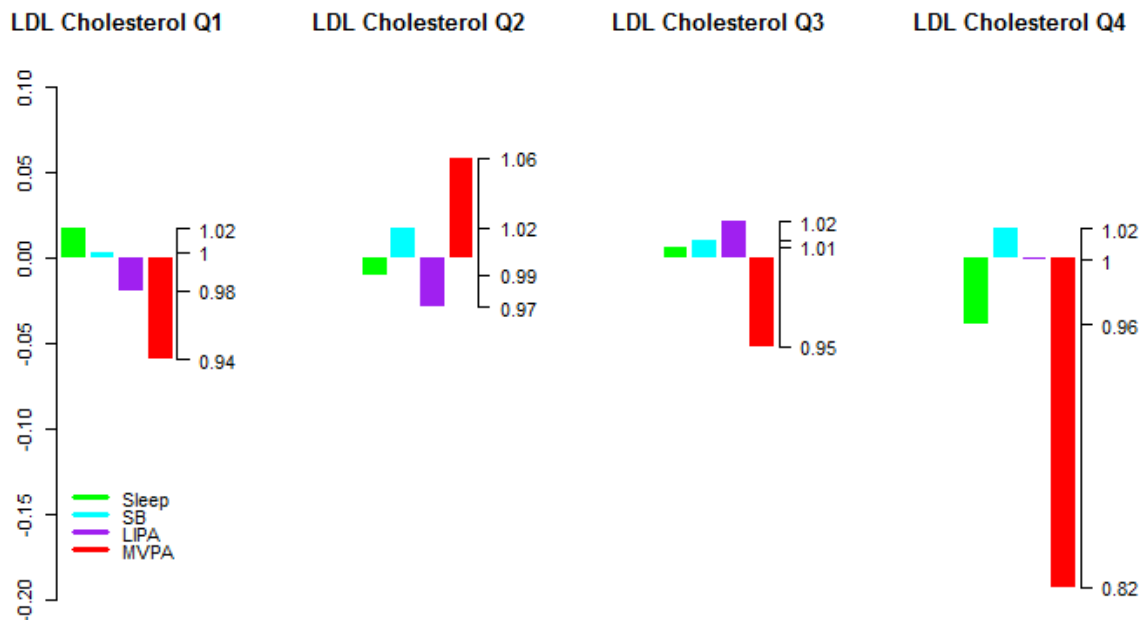

**Figure S8.** Average time-use compositions of the 24 hour day by LDL cholesterol quartiles for adults aged (18–64) in log-ratio scale and relative to the overall average time-use composition at the zero baseline. The left axis gives the log-ratio value and the right axis gives the actual proportion relative to the mean composition (e.g. 1.20 means 1.20 times).

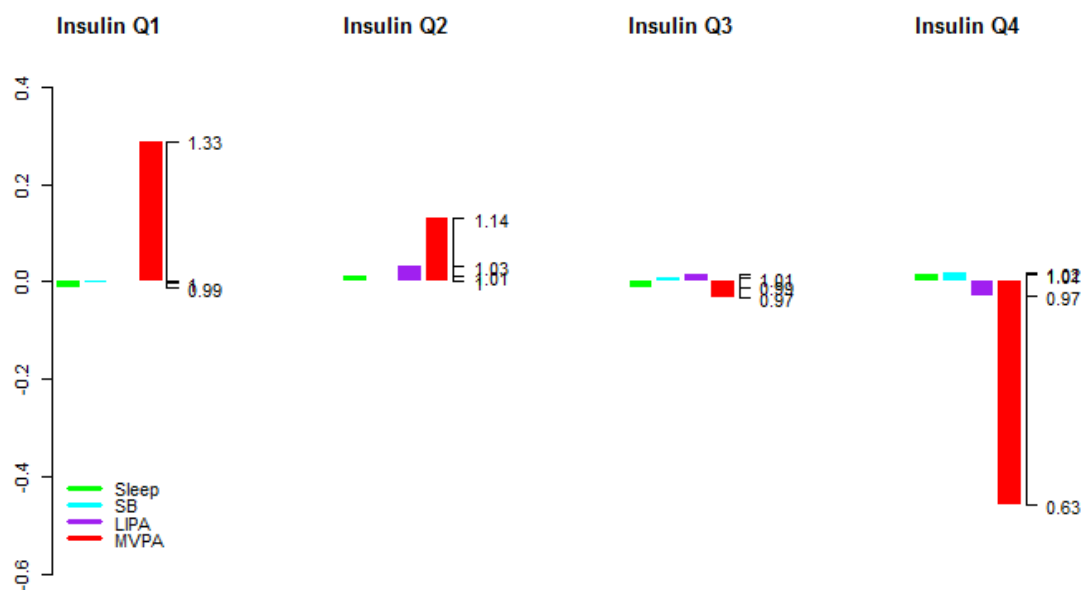

**Figure S9.** Average time-use compositions of the 24 hour day by insulin quartiles for adults aged (18–64) in log-ratio scale and relative to the overall average time-use composition at the zero baseline. The left axis gives the log-ratio value and the right axis gives the actual proportion relative to the mean composition (e.g. 1.20 means 1.20 times).

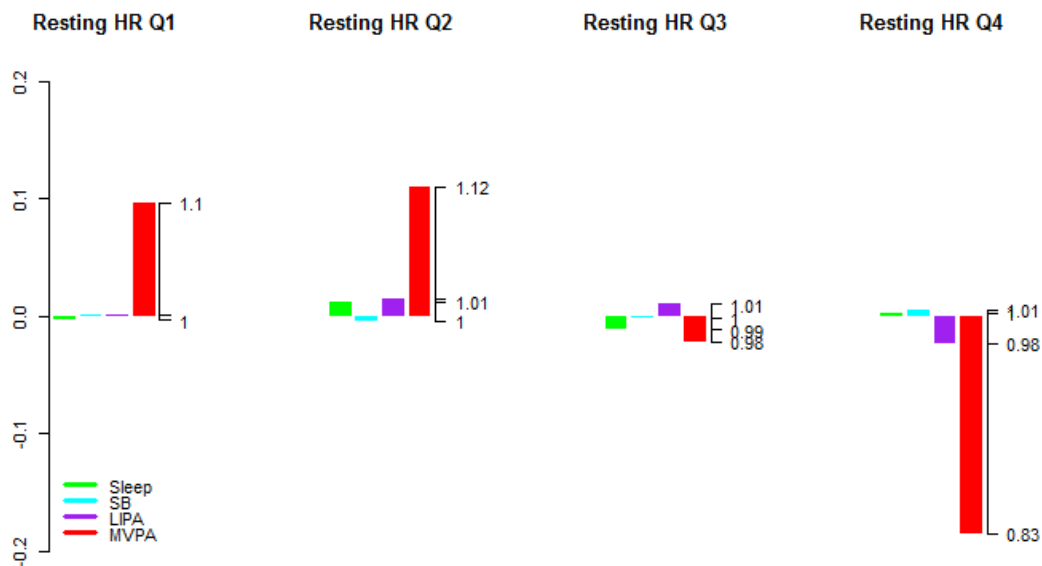

**Figure S10.** Average time-use compositions of the 24 hour day by resting heart rate quartiles for adults aged (18–64) in log-ratio scale and relative to the overall average time-use composition at the zero baseline. The left axis gives the log-ratio value and the right axis gives the actual proportion relative to the mean composition (e.g. 1.20 means 1.20 times).

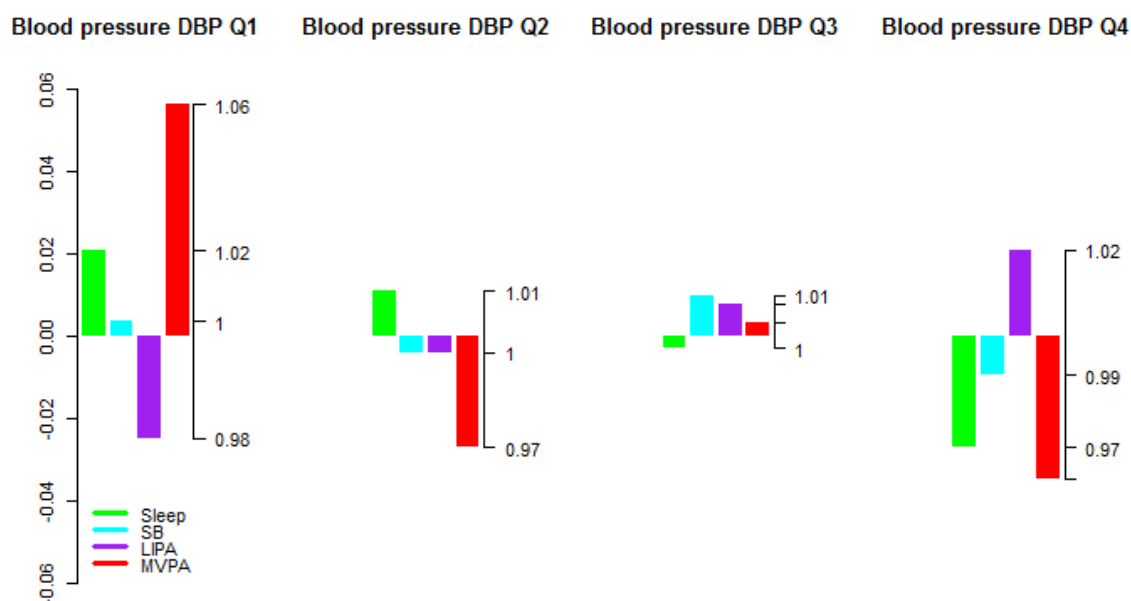

**Figure S11.** Average time-use compositions of the 24 hour day by diastolic blood pressure quartiles for adults aged (18–64) in log-ratio scale and relative to the overall average time-use composition at the zero baseline. The left axis gives the log-ratio value and the right axis gives the actual proportion relative to the mean composition (e.g. 1.20 means 1.20 times).

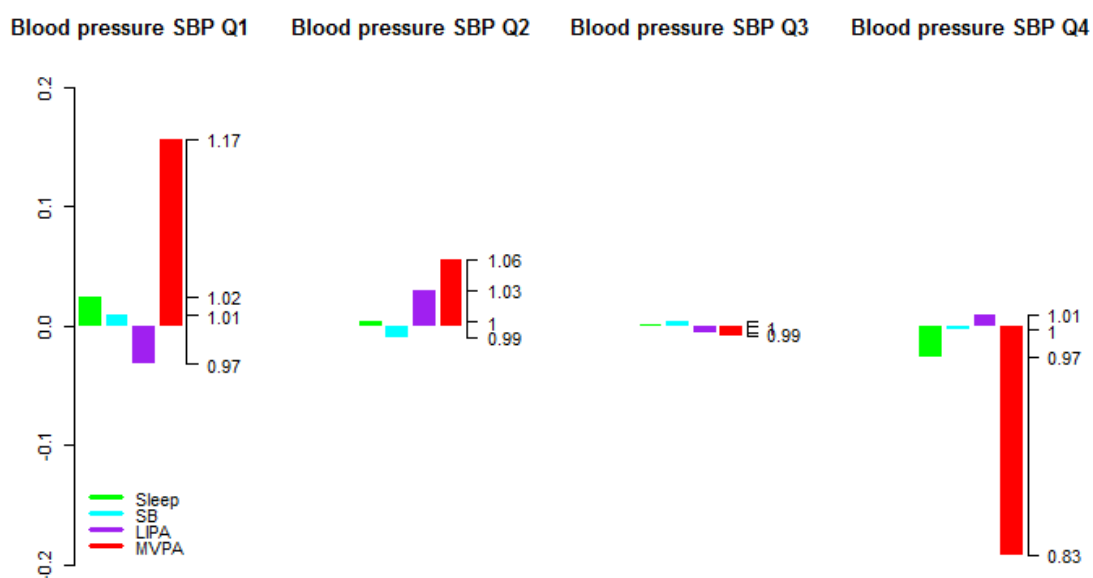

**Figure S12.** Average time-use compositions of the 24 hour day by systolic blood pressure quartiles for adults aged (18–64) in log-ratio scale and relative to the overall average time-use composition at the zero baseline. The left axis gives the log-ratio value and the right axis gives the actual proportion relative to the mean composition (e.g. 1.20 means 1.20 times).

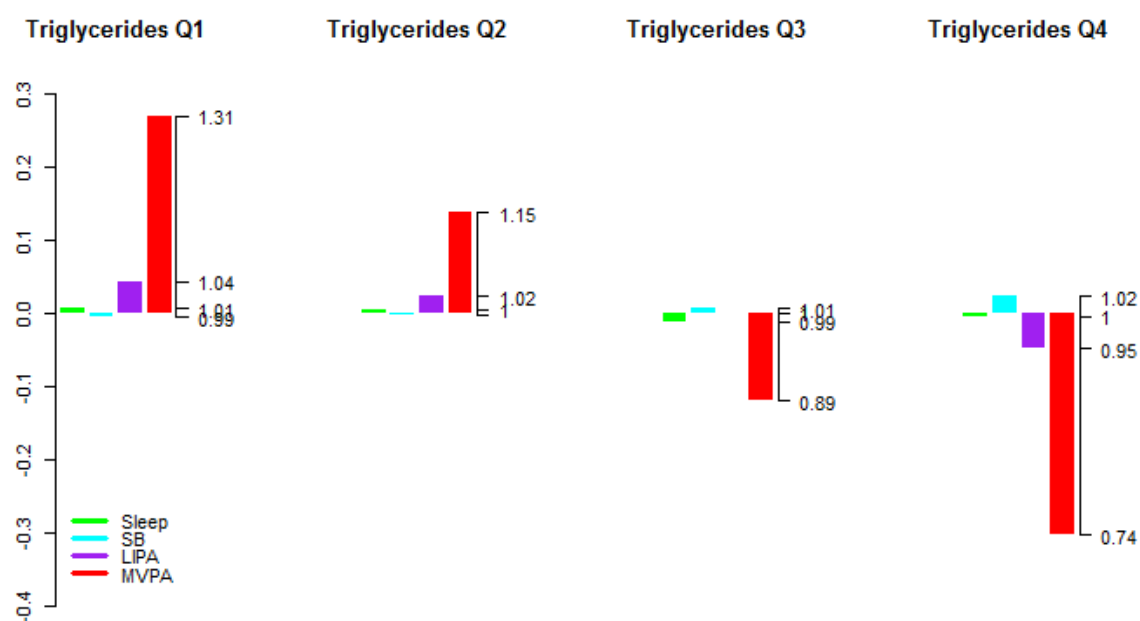

**Figure S13.** Average time-use compositions of the 24 hour day by triglycerides quartiles for adults aged (18–64) in log-ratio scale and relative to the overall average time-use composition at the zero baseline. The left axis gives the log-ratio value and the right axis gives the actual proportion relative to the mean composition (e.g. 1.20 means 1.20 times).

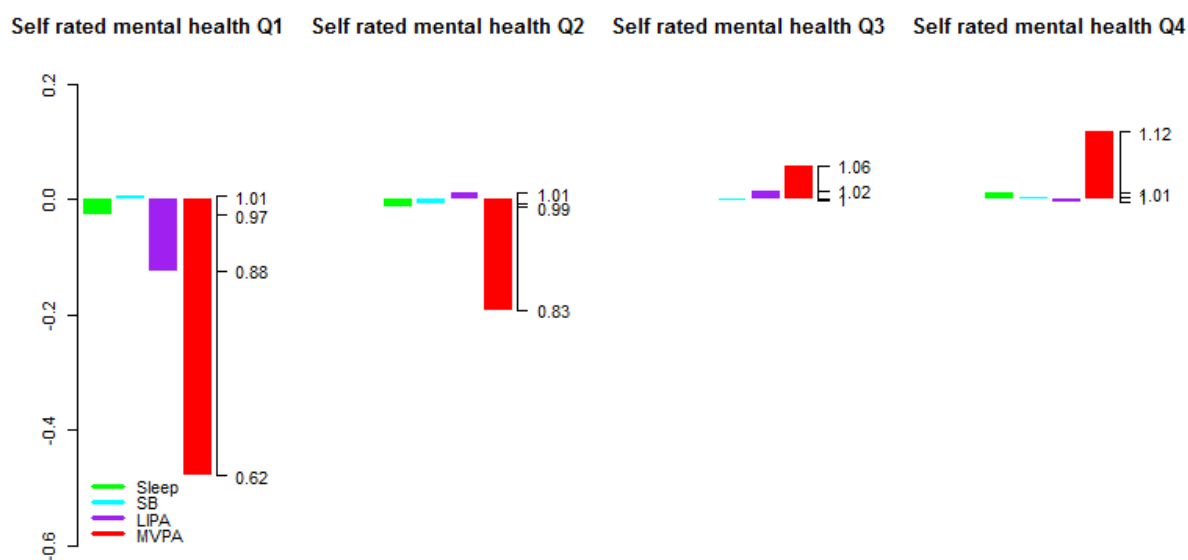

**Figure S14.** Average time-use compositions of the 24 hour day by self-rated mental health quartiles for adults aged (18–64) in log-ratio scale and relative to the overall average time-use composition at the zero baseline. The left axis gives the log-ratio value and the right axis gives the actual proportion relative to the mean composition (e.g. 1.20 means 1.20 times).

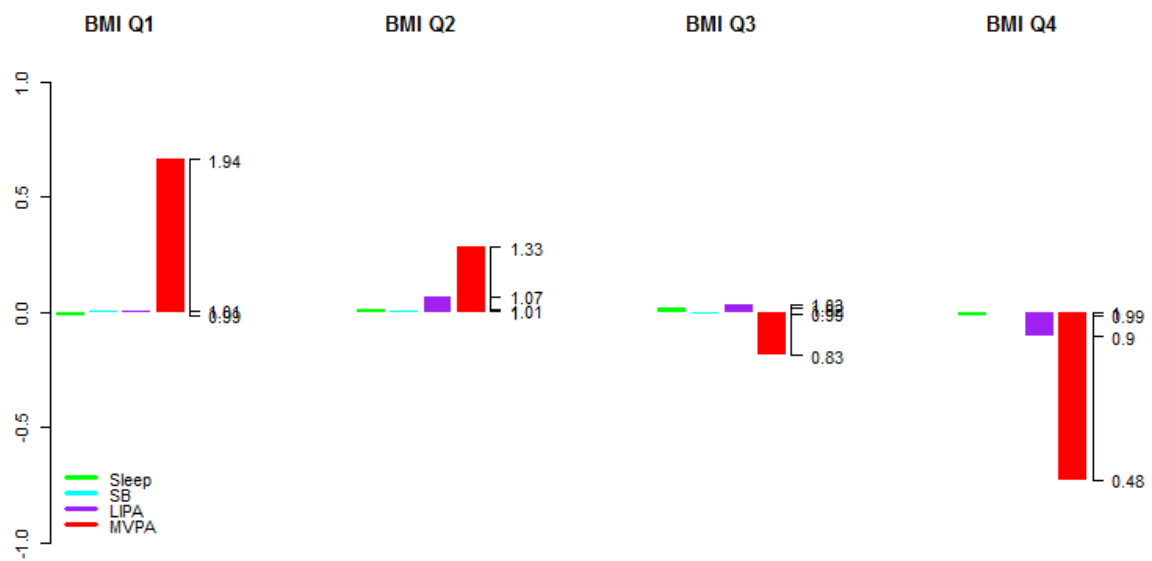

**Figure S15.** Average time-use compositions of the 24 hour day by BMI quartiles for older adults aged (65-79) in log-ratio scale and relative to the overall average time-use composition at the zero baseline. The left axis gives the log-ratio value and the right axis gives the actual proportion relative to the mean composition (e.g. 1.20 means 1.20 times).

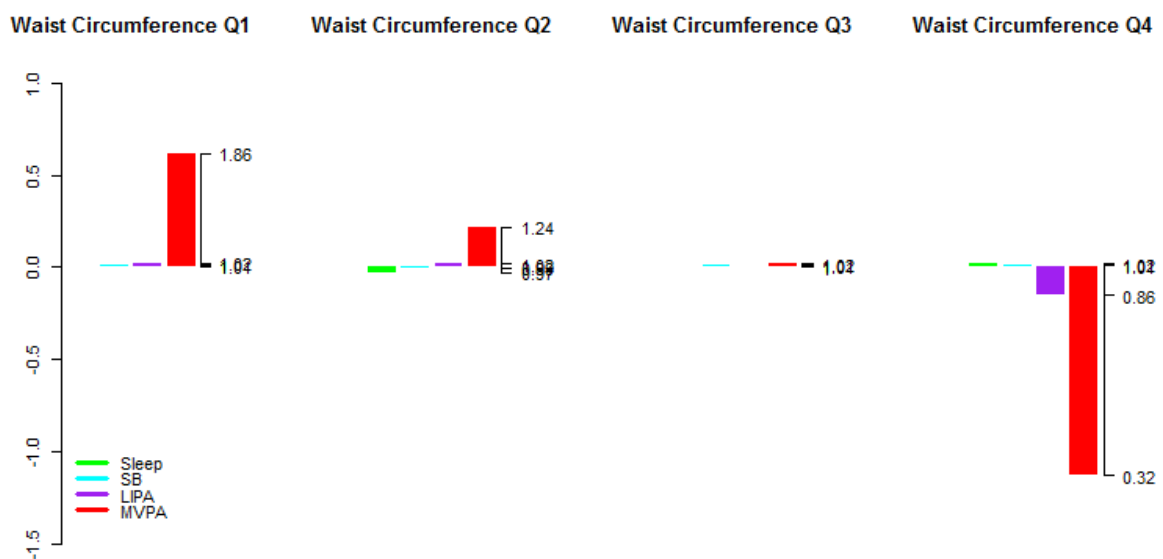

**Figure S16.** Average time-use compositions of the 24 hour day by waist circumference quartiles for older adults aged (65-79) in log-ratio scale and relative to the overall average time-use composition at the zero baseline. The left axis gives the log-ratio value and the right axis gives the actual proportion relative to the mean composition (e.g. 1.20 means 1.20 times).

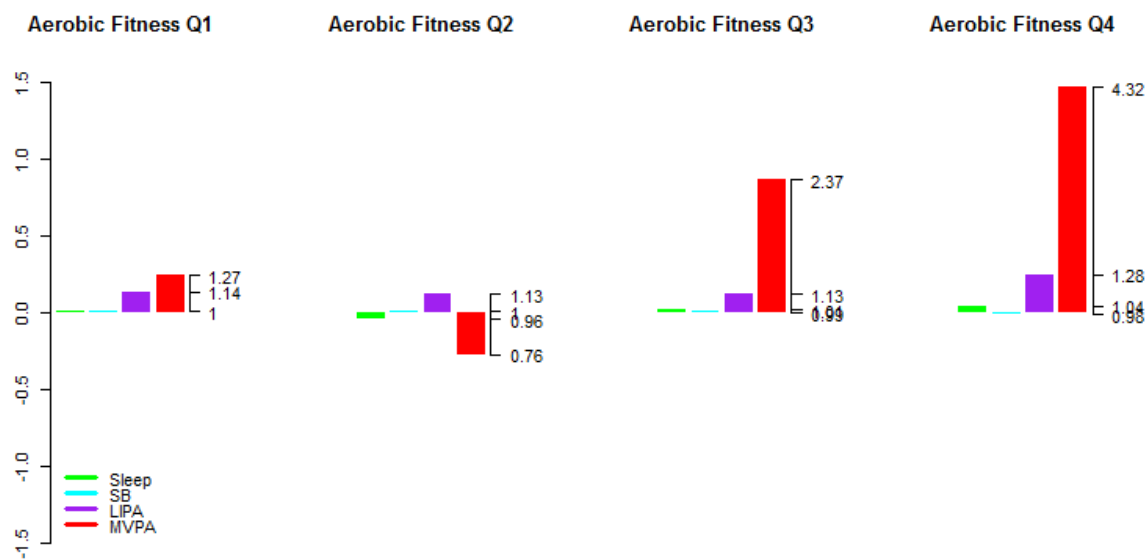

**Figure S17.** Average time-use compositions of the 24 hour day by VO2 maximum quartiles for older adults aged (65-79) in log-ratio scale and relative to the overall average time-use composition at the zero baseline. The left axis gives the log-ratio value and the right axis gives the actual proportion relative to the mean composition (e.g. 1.20 means 1.20 times).

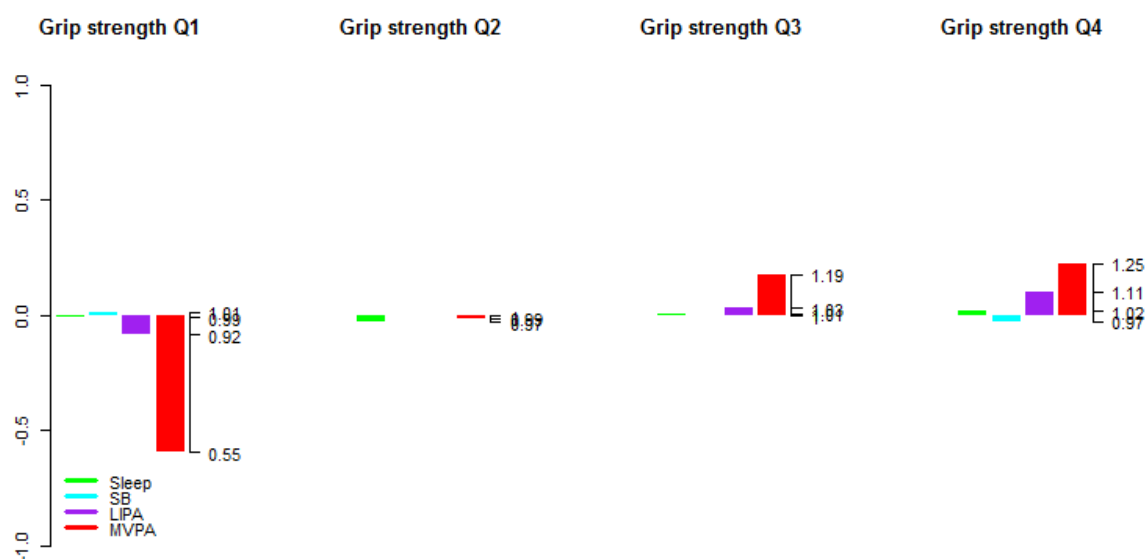

**Figure S18.** Average time-use compositions of the 24 hour day by grip strength quartiles for older adults aged (65-79) in log-ratio scale and relative to the overall average time-use composition at the zero baseline. The left axis gives the log-ratio value and the right axis gives the actual proportion relative to the mean composition (e.g. 1.20 means 1.20 times).

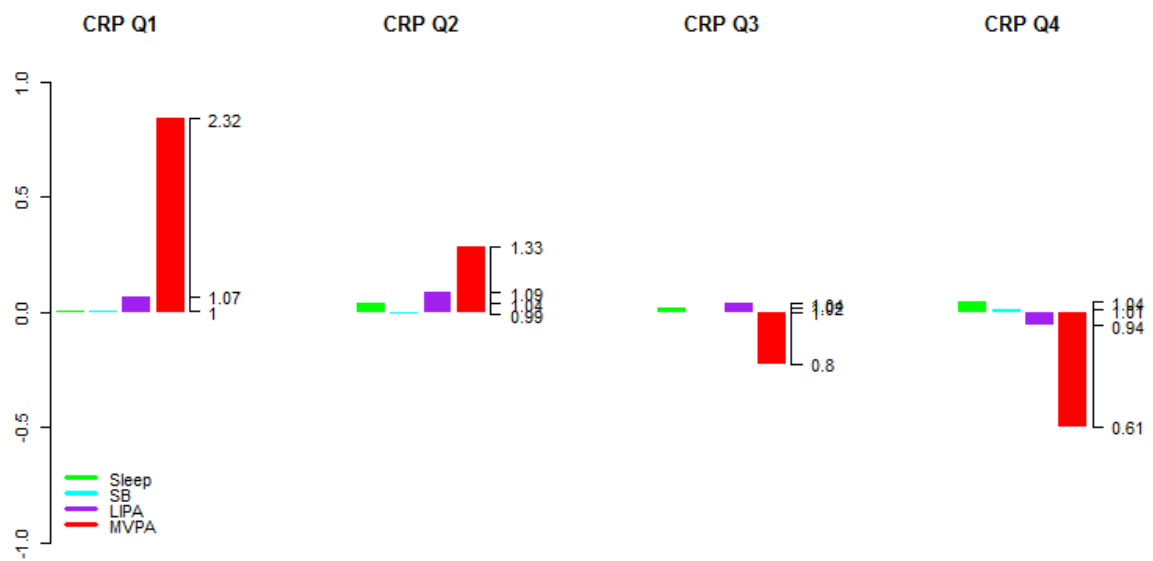

**Figure S19.** Average time-use compositions of the 24 hour day by CRP quartiles for older adults aged (65-79) in log-ratio scale and relative to the overall average time-use composition at the zero baseline. The left axis gives the log-ratio value and the right axis gives the actual proportion relative to the mean composition (e.g. 1.20 means 1.20 times).

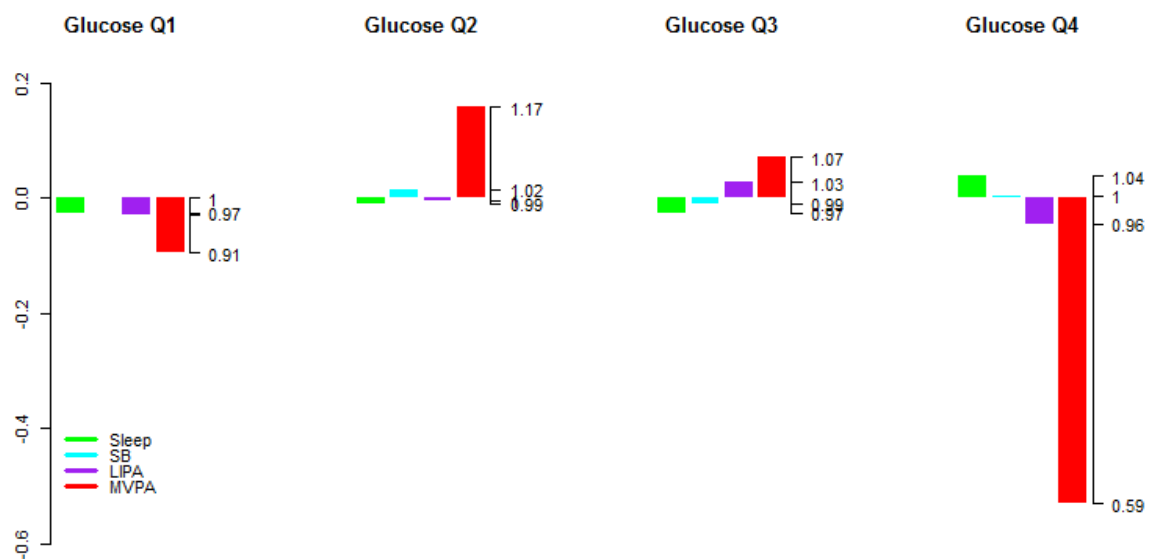

**Figure S20.** Average time-use compositions of the 24 hour day by blood glucose quartiles for older adults aged (65-79) in log-ratio scale and relative to the overall average time-use composition at the zero baseline. The left axis gives the log-ratio value and the right axis gives the actual proportion relative to the mean composition (e.g. 1.20 means 1.20 times).

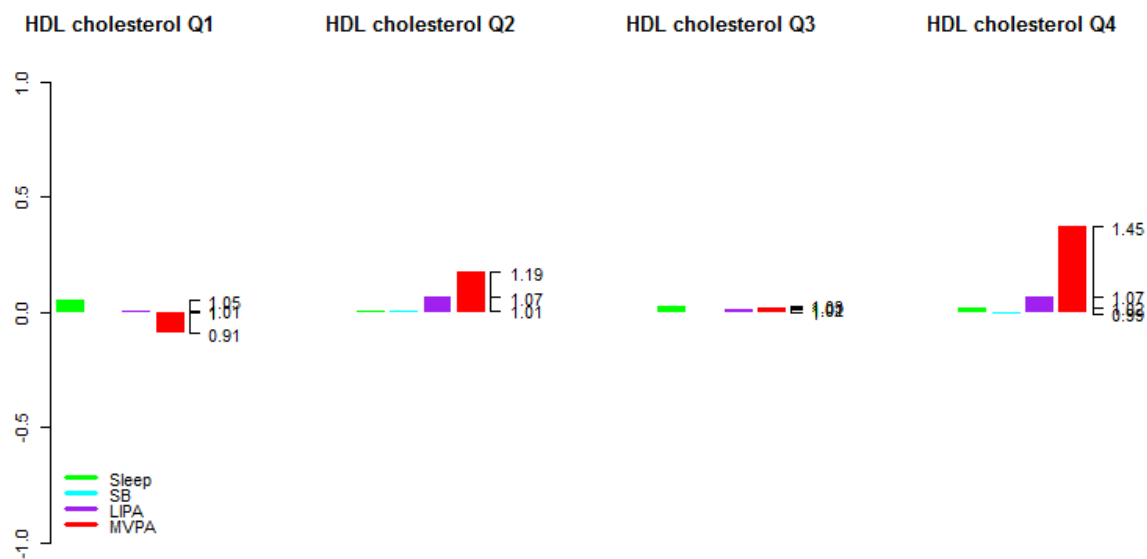

**Figure S21.** Average time-use compositions of the 24 hour day by HDL cholesterol quartiles for older adults aged (65-79) in log-ratio scale and relative to the overall average time-use composition at the zero baseline. The left axis gives the log-ratio value and the right axis gives the actual proportion relative to the mean composition (e.g. 1.20 means 1.20 times).

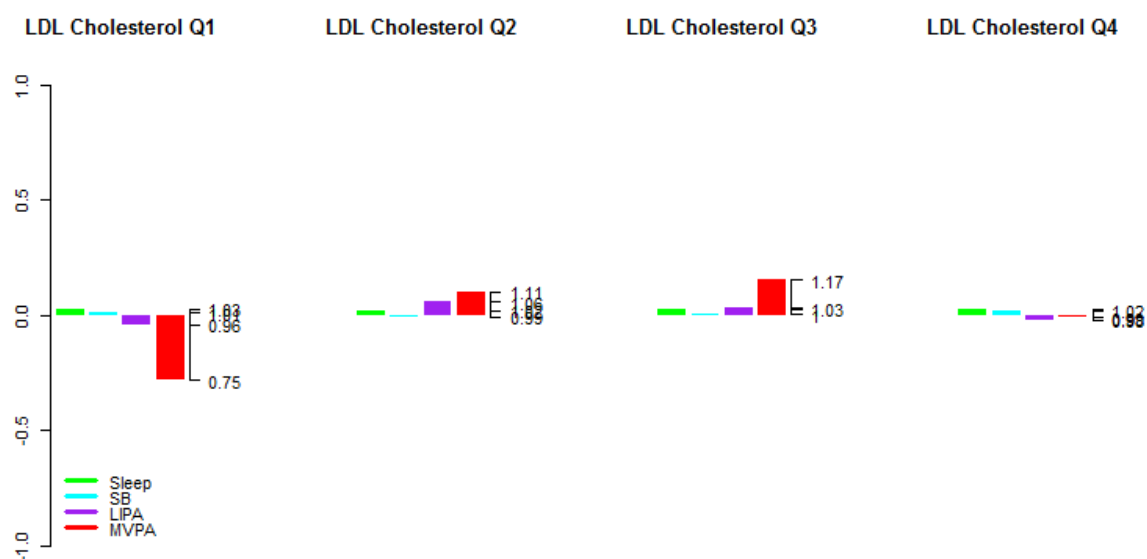

**Figure S22.** Average time-use compositions of the 24 hour day by LDL cholesterol quartiles for older adults aged (65-79) in log-ratio scale and relative to the overall average time-use composition at the zero baseline. The left axis gives the log-ratio value and the right axis gives the actual proportion relative to the mean composition (e.g. 1.20 means 1.20 times).

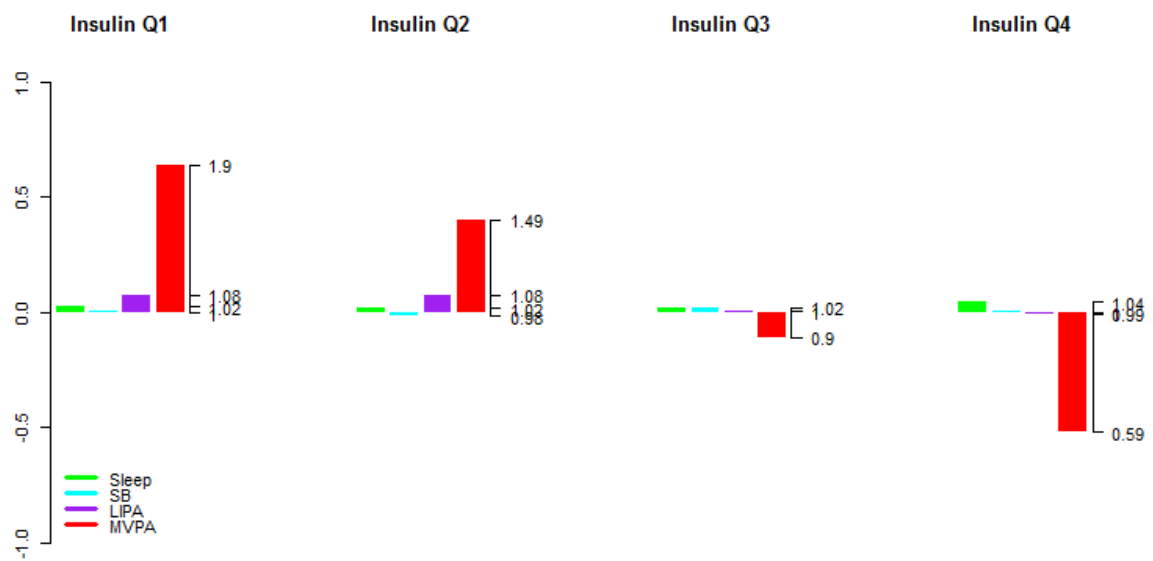

**Figure S23.** Average time-use compositions of the 24 hour day by insulin quartiles for older adults aged (65-79) in log-ratio scale and relative to the overall average time-use composition at the zero baseline. The left axis gives the log-ratio value and the right axis gives the actual proportion relative to the mean composition (e.g. 1.20 means 1.20 times).

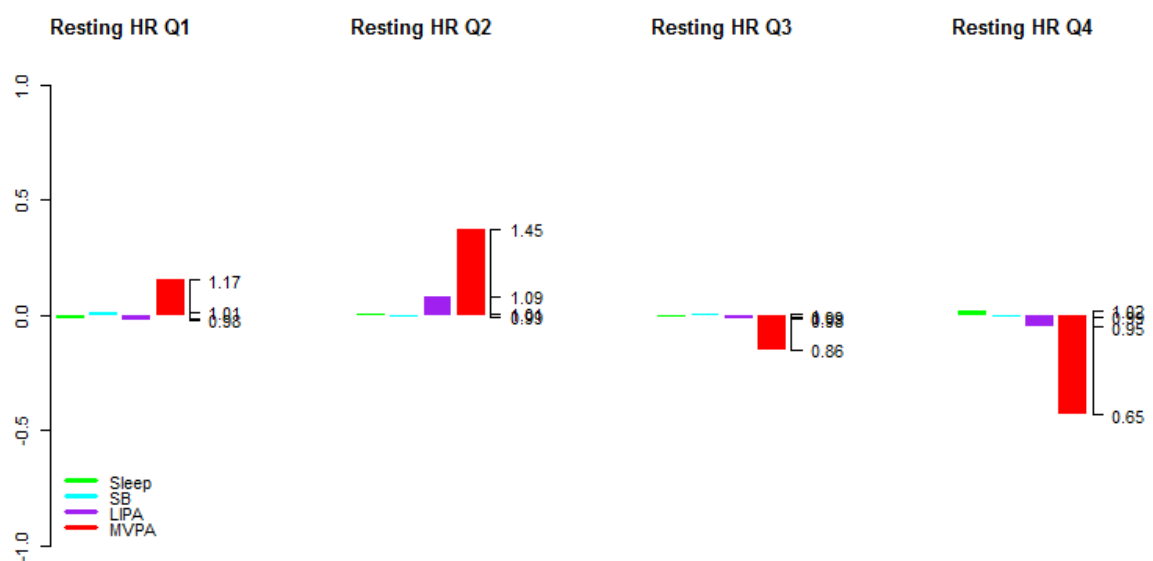

**Figure S24.** Average time-use compositions of the 24 hour day by resting heart rate quartiles for older adults aged (65-79) in log-ratio scale and relative to the overall average time-use composition at the zero baseline. The left axis gives the log-ratio value and the right axis gives the actual proportion relative to the mean composition (e.g. 1.20 means 1.20 times).

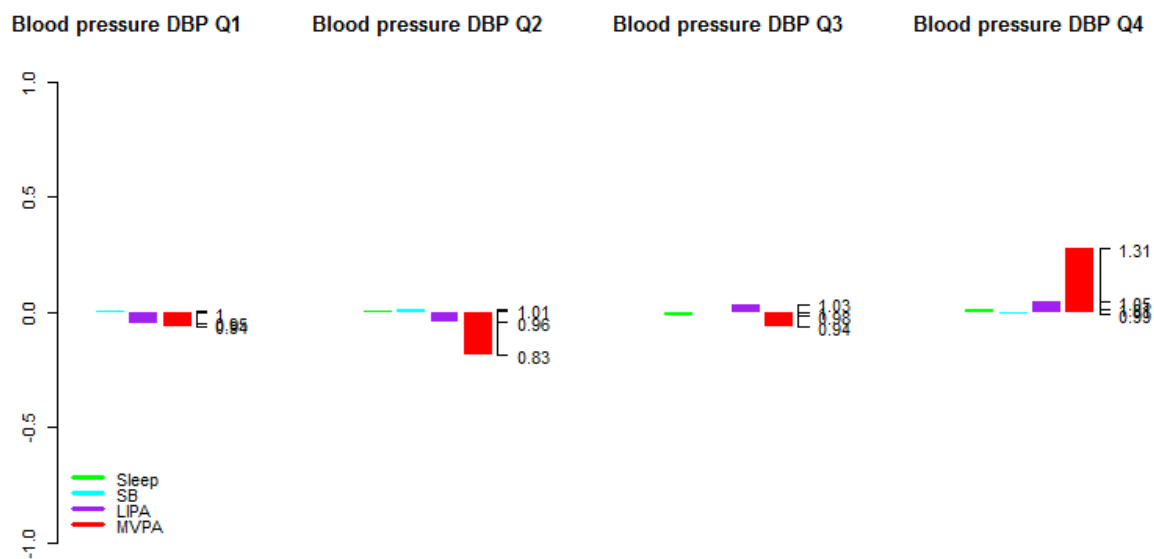

**Figure S25.** Average time-use compositions of the 24 hour day by diastolic blood pressure quartiles for older adults aged (65-79) in log-ratio scale and relative to the overall average time-use composition at the zero baseline. The left axis gives the log-ratio value and the right axis gives the actual proportion relative to the mean composition (e.g. 1.20 means 1.20 times).

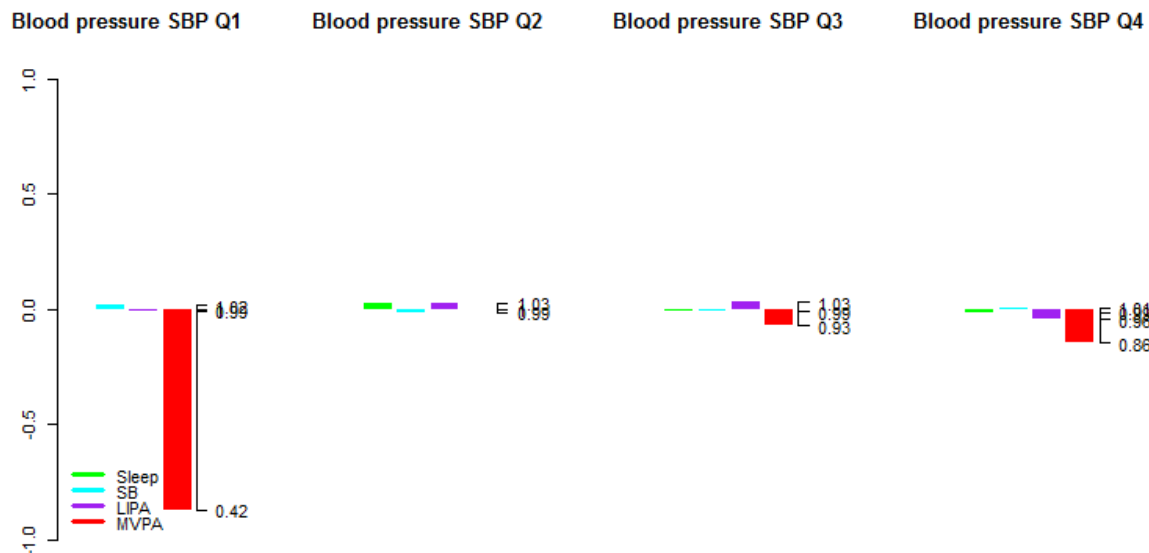

**Figure S26.** Average time-use compositions of the 24 hour day by systolic blood pressure quartiles for older adults aged (65-79) in log-ratio scale and relative to the overall average time-use composition at the zero baseline. The left axis gives the log-ratio value and the right axis gives the actual proportion relative to the mean composition (e.g. 1.20 means 1.20 times).

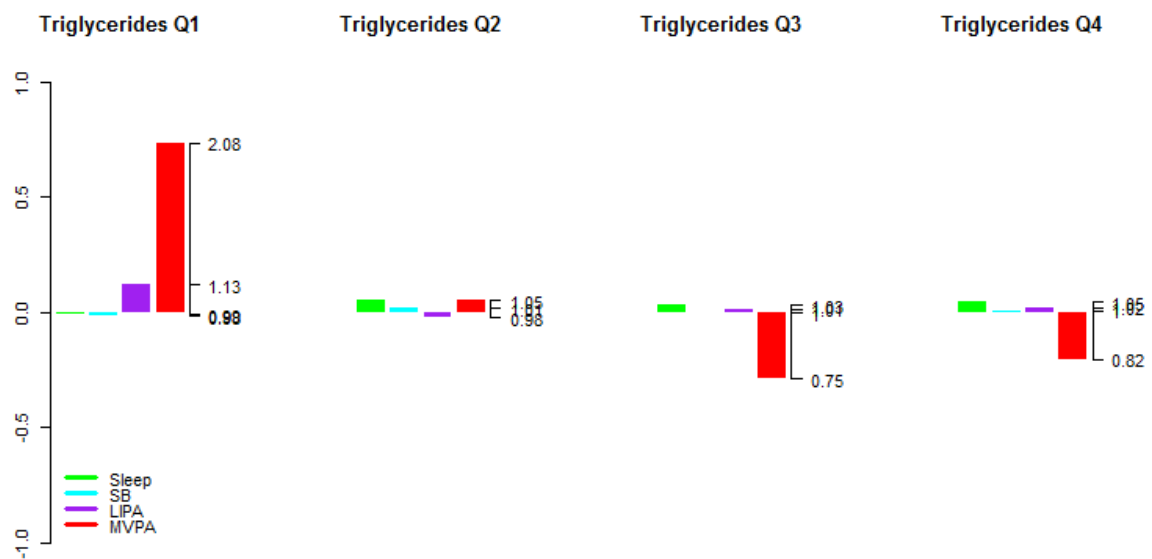

**Figure S27.** Average time-use compositions of the 24 hour day by triglycerides quartiles for older adults aged (65-79) in log-ratio scale and relative to the overall average time-use composition at the zero baseline. The left axis gives the log-ratio value and the right axis gives the actual proportion relative to the mean composition (e.g. 1.20 means 1.20 times).

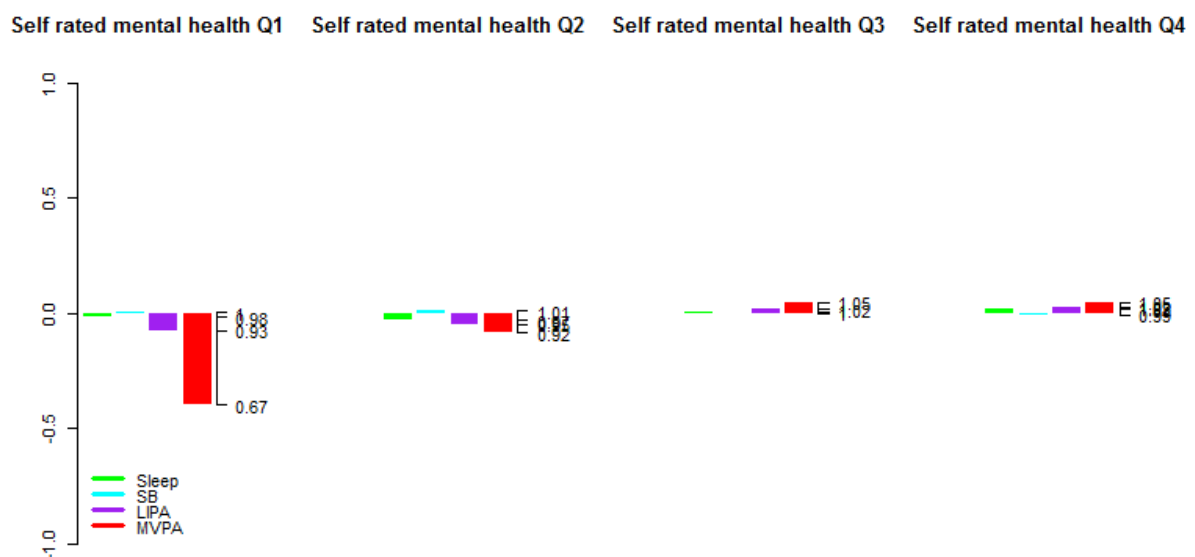

**Figure S28.** Average time-use compositions of the 24 hour day by self-rated mental health quartiles for older adults aged (65-79) in log-ratio scale and relative to the overall average time-use composition at the zero baseline. The left axis gives the log-ratio value and the right axis gives the actual proportion relative to the mean composition (e.g. 1.20 means 1.20 times).

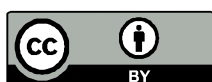

Supplement: Supplementary file 1 [file ijerph-15-01779-s001.pdf]
