# Supplementary material
Source: MDPI journal article supplement (https://www.mdpi.com/1660-4601/15/8/1779)
Supplement: s2 [file s2]

Archive with 1 entries (1 files):
- ijerph-337360-SI.pdf
